# Supplementary material for: Octopod PtCu Nanoframe for Dual-Modal Imaging-Guided Synergistic Photothermal Radiotherapy
Source: PubMed Central journal article supplement — Theranostics. 2018 Jan 1;8(4):1042–58. doi: 10.7150/thno.22557 (PMC5817109; doi:10.7150/thno.22557), 2018-01-01
Supplement: thnov08p1042s1.pdf [file thnov08p1042s1.pdf]

## Supporting Information

*for*

### **Octopod PtCu Nanoframe for Dual-Modal Imaging-Guided Synergistic Photothermal Radiotherapy**

Jinghua Li<sup>a</sup>, Xiangyang Zu<sup>a</sup>, Gaofeng Liang<sup>a</sup>, KeKe Zhang<sup>b</sup>, Yuliang Liu<sup>b\*</sup>, Ke Li<sup>c</sup>, Zhong Luo<sup>c</sup>, Kaiyong Cai<sup>c\*</sup>

<sup>a</sup>School of Medical Technology and Engineering, Henan University of Science and Technology, Luoyang 471023, China.

<sup>b</sup>School of Materials Science and Engineering, Henan University of Science and Technology, Luoyang 471023, China.

<sup>c</sup>Key Laboratory of Biorheological Science and Technology, Ministry of Education, College of Bioengineering, Chongqing University, Chongqing 400044, China.

E-mail: [kaiyong\\_cai@cqu.edu.cn](mailto:kaiyong_cai@cqu.edu.cn)

## **List of Contents**

|                                                                                                                   |     |
|-------------------------------------------------------------------------------------------------------------------|-----|
| <b>Figure S1.</b> TEM images of OPCNs along with synthesis steps-----                                             | S3  |
| <b>Figure S2.</b> SEM images of the as-synthesized OPCNs -----                                                    | S4  |
| <b>Figure S3.</b> Particle size distribution of the as-synthesized OPCNs -----                                    | S5  |
| <b>Figure S4.</b> HAADF-STEM images of OPCNs from different perspectives-----                                     | S6  |
| <b>Figure S5.</b> XPS spectra of the as-prepared OPCNs-----                                                       | S7  |
| <b>Figure S6.</b> FTIR spectra of OPCNs-PEG-FA-----                                                               | S8  |
| <b>Figure S7.</b> Zeta potentials of the as-synthesized nanoparticles-----                                        | S9  |
| <b>Figure S8.</b> Stability, dispersion and thermogenesis capacity of OPCNs-PEG-FA in<br>different solutions----- | S10 |
| <b>Figure S9.</b> Targeting uptake of the OPCNs-PEG-FA-----                                                       | S11 |
| <b>Figure S10.</b> Cell endocytosis mechanism assay-----                                                          | S12 |
| <b>Figure S11.</b> The predicted isobologram for combined treatment-----                                          | S13 |
| <b>Figure S12.</b> Cell death analysis by flow cytometry analysis-----                                            | S14 |
| <b>Table S1.</b> Pharmacokinetic study of the OPCNs-PEG-FA-----                                                   | S15 |
| <b>Table S2.</b> Hemocompatibility study of the OPCNs-PEG-FA <i>in vivo</i> -----                                 | S16 |

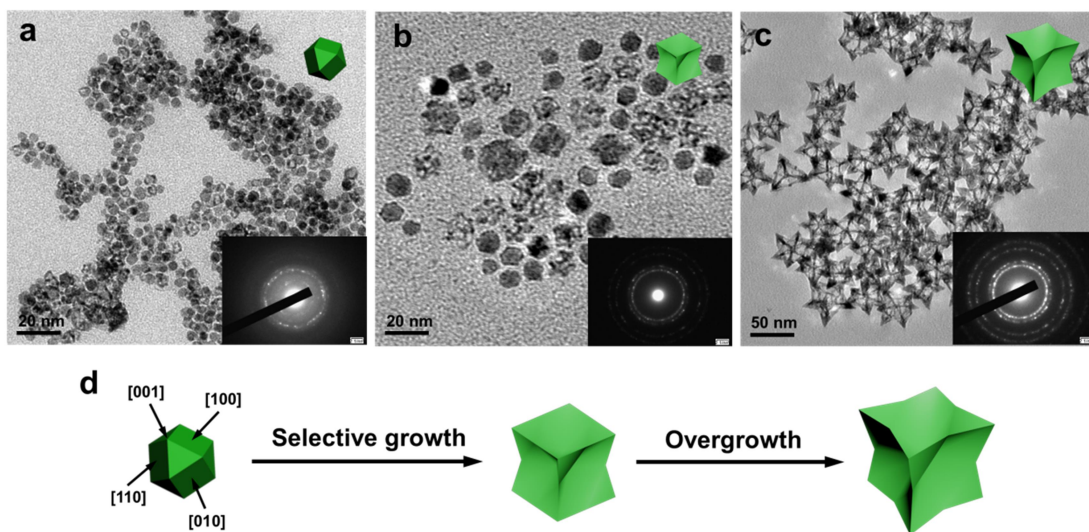

**Figure S1.** TEM images obtained at different times during the fabrication of octopod PtCu nanoframes: (a) 1 h, (b) 6 h and (c) 48 h, respectively. The inset images exhibit the diffraction rings of nanoframes at different steps; and (d) schematic preparation of OPCNs of the major steps during synthesis process.

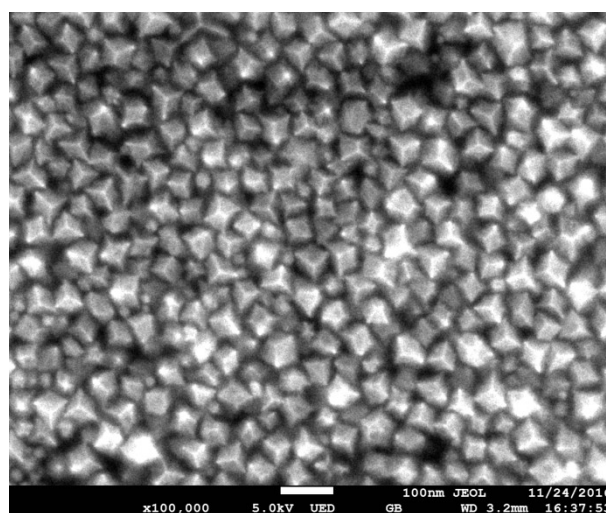

**Figure S2.** Representative SEM image of the as-synthesized OCPNs. Scale bar: 100 nm.

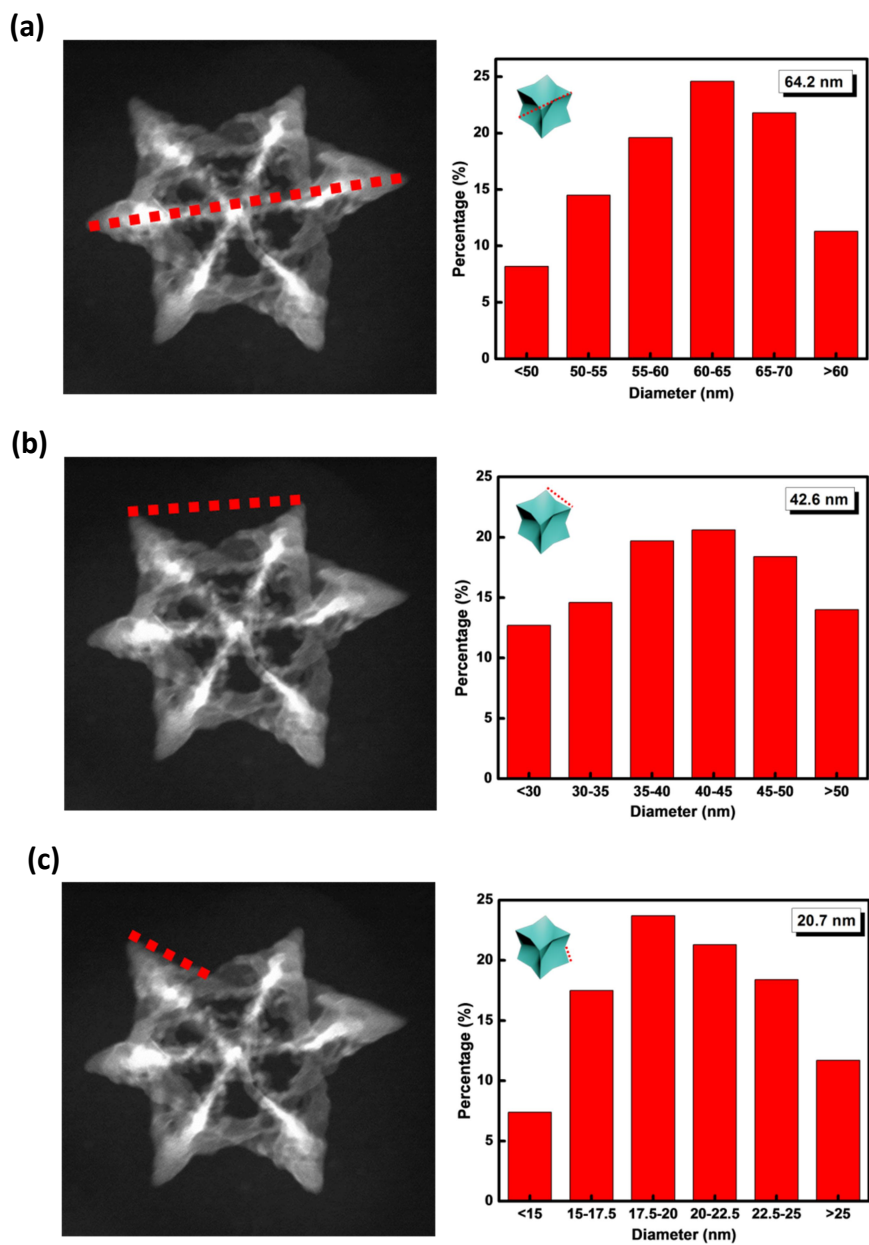

**Figure S3.** Particle size distributions of the as-synthesized OPCNs: (a) diagonal length; (b) edge breadth; and (c) eight symmetric feet length, respectively.

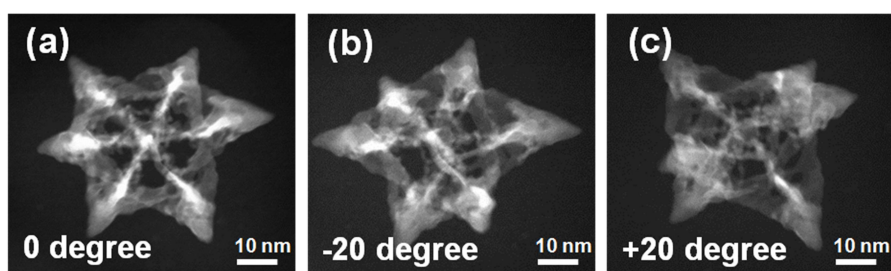

**Figure S4.** Angle dependent HAADF-STEM images of the OPCNs from different perspectives with concave octopod feature: (a) original position; (b) -20 degree at X-axis; and (c) +20 degree at X-axis.

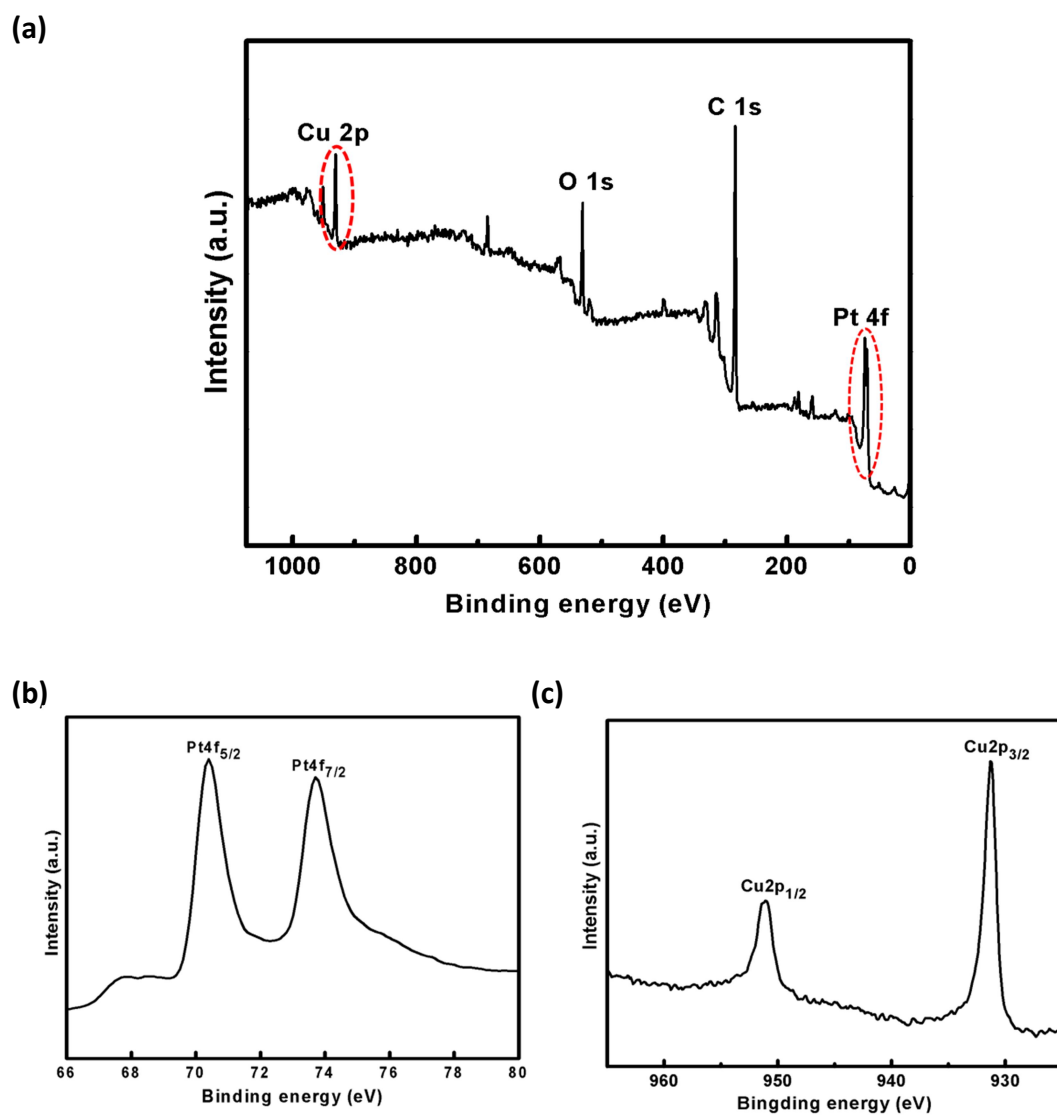

**Figure S5.** XPS spectra of the as-prepared PtCu nanoframes: (a) OPCNs; (b) Pt 4f; and (c) Cu 2p bands.

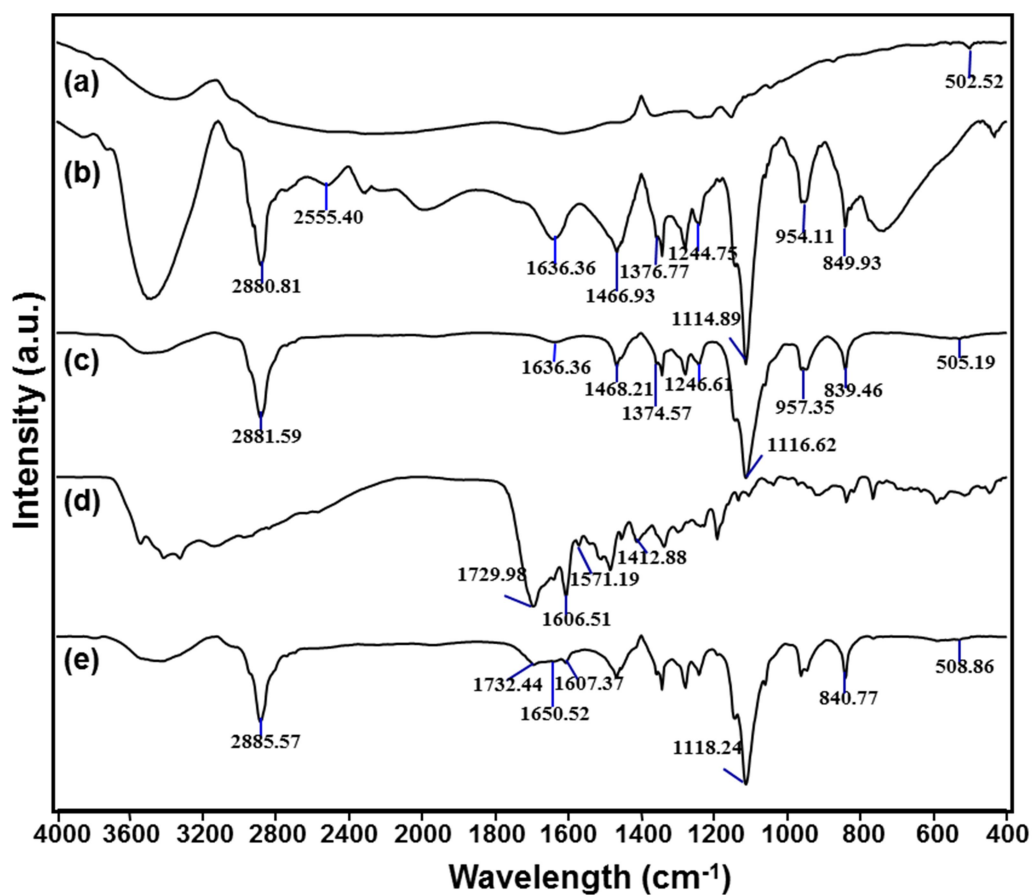

**Figure S6.** FTIR spectra of nanoparticles at major steps during the synthesis process of OPCNs-PEG-FA: (a) OPCNs; (b) Pure SH-PEG-NH<sub>2</sub>; (c) OPCNs-PEG; (d) Pure FA; and (e) OPCNs-PEG-FA, respectively.



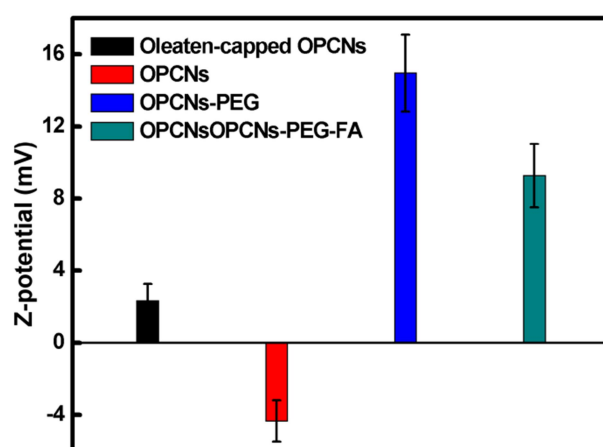

**Figure S7.** Zeta potentials of the as-synthesized nanoparticles at different steps during the fabrication process (n = 5).

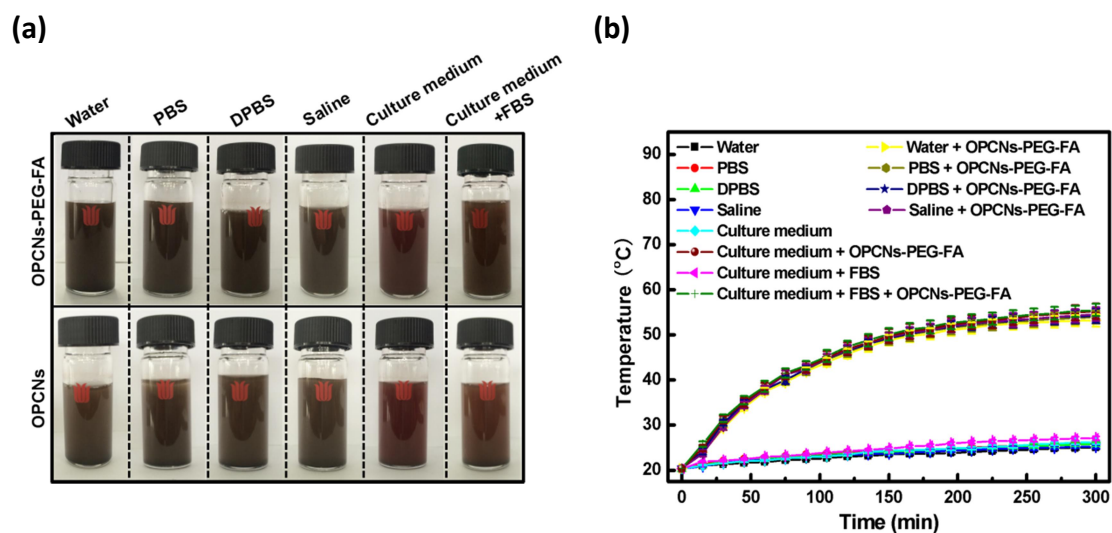

**Figure S8.** (a) The stability and dispersion of OPCNs nanoparticles in different solutions after 24 h; and (b) thermogenesis capacity of OPCNs-PEG-FA (200  $\mu\text{g/mL}$ ) irradiated with NIR laser (808 nm, 2.4  $\text{W/cm}^2$ , 5 min) in different solutions.

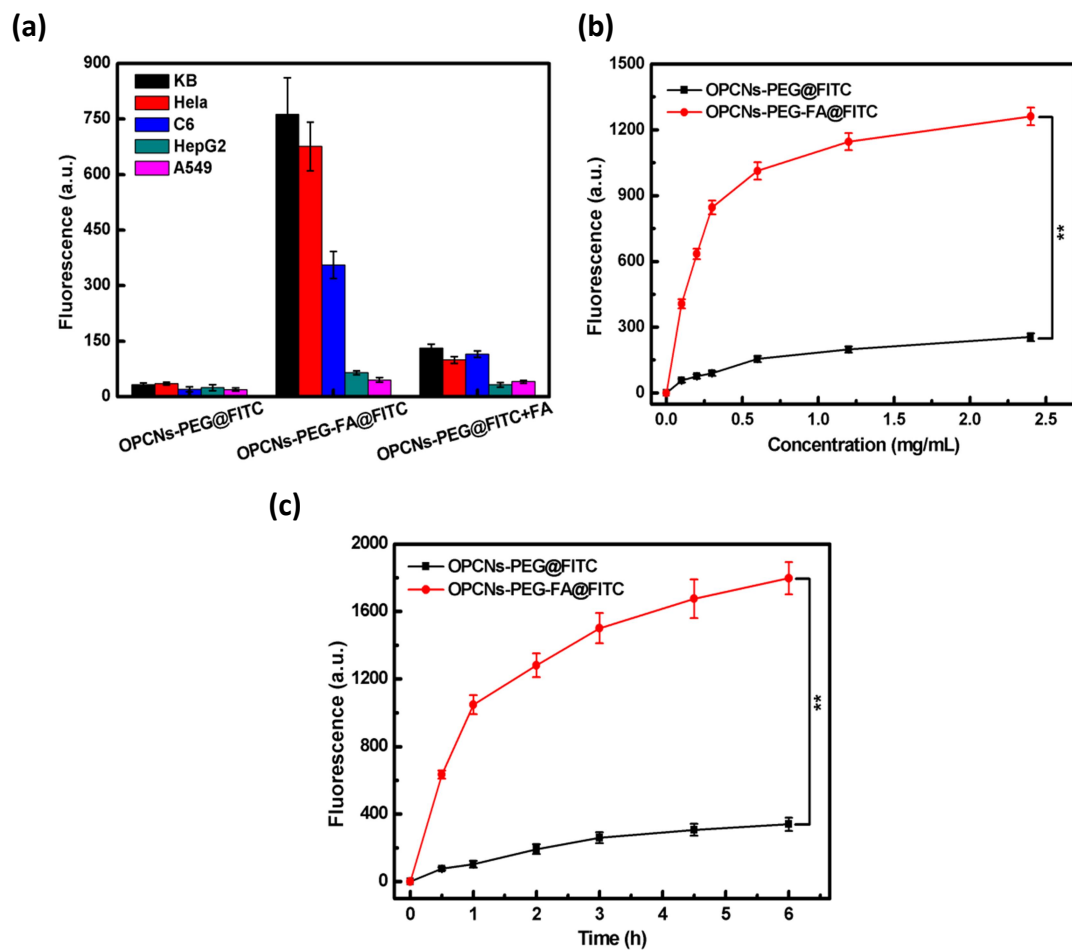

**Figure S9.** Targeting uptake assay: (a) folic acid-receptor (FR) mediated targeting capacity of OPCNs-PEG-FA evaluated with FR positive (KB, HeLa, C6) and negative (HepG2, A549) cancer cells; (b) concentration dependence of OPCNs-PEG-FA@FITC nanoparticles uptake by HeLa cells (incubation time: 1 h); and (c) time dependence of OPCNs-PEG-FA@FITC (200  $\mu$ g/mL) uptake by HeLa cells. \*\* p < 0.01 (n = 3).

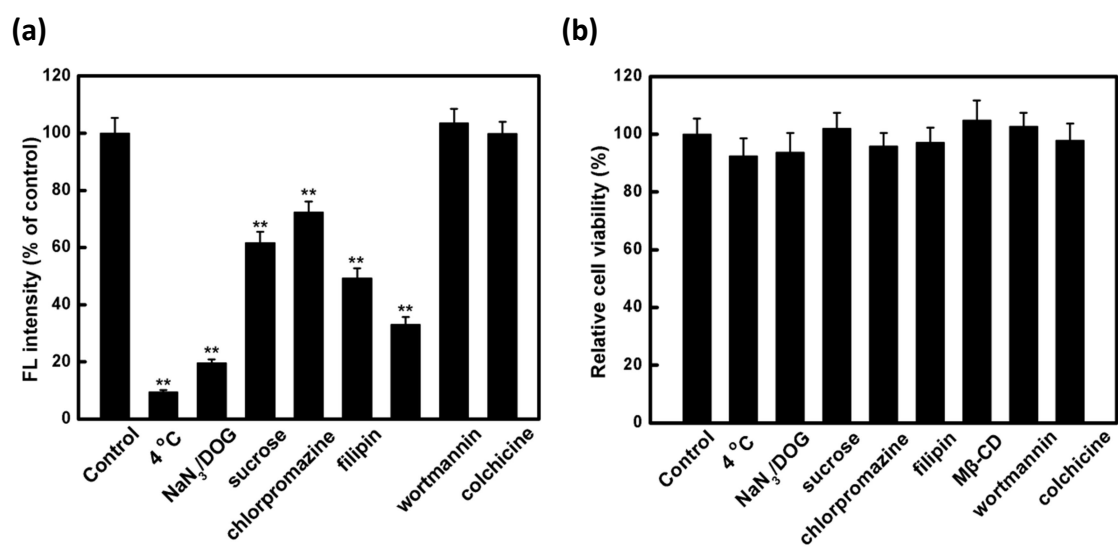

**Figure S10.** Cell endocytosis mechanism assay: (a) relative uptake percentages of OPCNs-PEG-FA after treatment with different uptake inhibitors; (b) relative cells viability when incubating with corresponding different uptake inhibitors. Data are presented as means  $\pm$  SD,  $p < 0.01$  ( $n=3$ ).

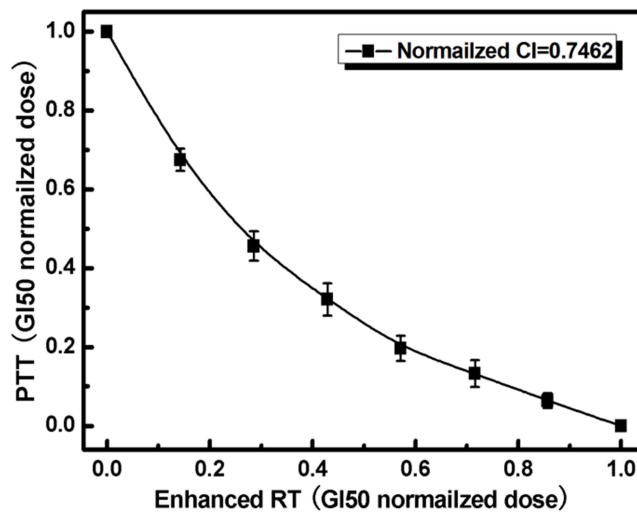

**Figure S11.** The predicted isobologram for combination enhanced radiotherapy and photothermal therapy.

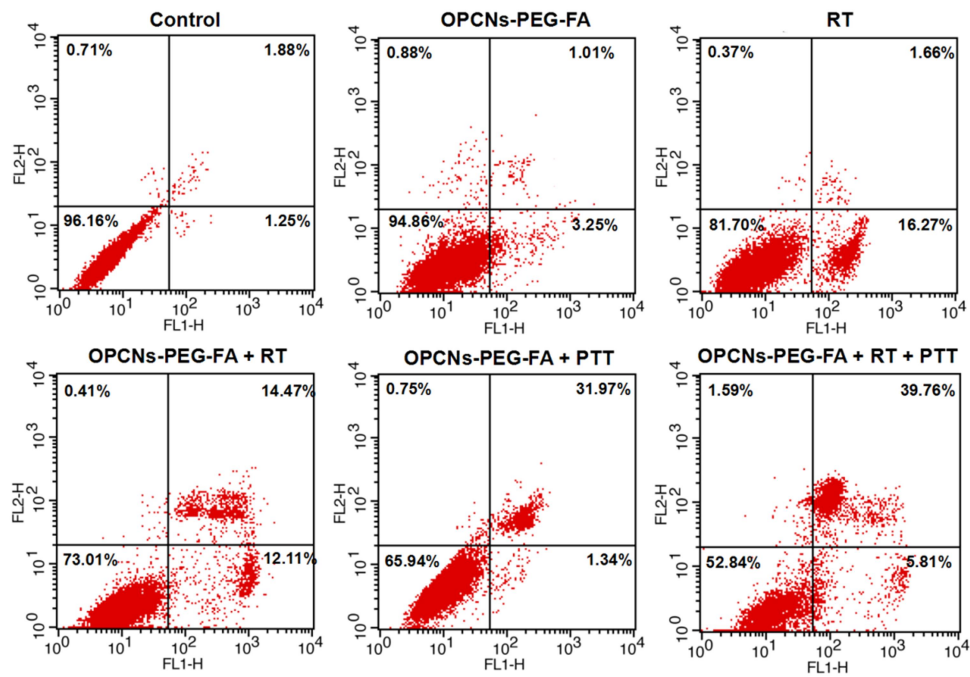

**Figure S12.** Cell death assay of HepG2 cells after synergic photothermal radiotherapy by flow cytometry.

**Table S1.** The main pharmacokinetic parameters of the as-synthesized nanoparticles (n = 5).

| <i>Parameters</i>         | <i>OPCNs</i>       | <i>OPCNs-PEG-FA</i> |
|---------------------------|--------------------|---------------------|
| $C_{\max}$ (mg/L)         | 20.620 ± 3.690     | 21.587 ± 3.025      |
| A (mg/L)                  | 17.639 ± 1.780     | 14.764 ± 3.533      |
| $\alpha$ (1/h)            | 0.125 ± 0.014      | 0.178 ± 0.022       |
| B (mg/L)                  | 3.590 ± 0.630      | 2.448 ± 0.890       |
| $\beta$ (1/h)             | 0.007 ± 0.003      | 0.011 ± 0.005       |
| $AUC_{0-\infty}$ (mg/L/h) | 141.230 ± 27.554** | 367.620 ± 43.264**  |
| $T_{1/2}$ (h)             | 1.859 ± 0.478**    | 3.223 ± 0.674**     |
| MRT (h)                   | 0.976 ± 1.641**    | 2.357 ± 3.504**     |
| CL (L/kg/h)               | 2.18 ± 0.530**     | 1.271 ± 3.110**     |

**Table S2.** Hemolytic ratio (HR), Prothrombin time (PT), activated partial thromboplastin time (APTT) and thrombin time (TT) of the as-synthesized nanoparticles (n = 5).

| <i>Materials</i> | <i>HR(%)</i> | <i>PT(s)</i> | <i>APTT(s)</i> | <i>TT(s)</i> |
|------------------|--------------|--------------|----------------|--------------|
| Control          | 2.92± 0.46   | 11.3 ± 2.3   | 32.4 ± 3.8     | 14.5 ± 2.5   |
| OPCNs            | 4.02 ± 0.64  | 13.7 ± 1.6   | 34.7 ± 4.6     | 15.6 ± 1.1   |
| OPCNs-PEG        | 2.18 ± 0.53  | 11.8 ± 3.1   | 33.1 ± 4.1     | 13.6 ± 3.1   |
| OPCNs-PEG-FA     | 3.38 ± 0.99  | 12.4 ± 2.8   | 33.8 ± 3.5     | 14.7 ± 2.4   |
